# Supplementary material for: Catchment-scale mechanistic predictions of microplastic transport and distribution across land and water
Source: Research Square preprint supplement (doi:10.21203/rs.3.rs-1768285/v1), 2022-07-06
Supplement: Supplementary file 1 [file 9ea6406723ea8a4f69b60541.docx]

**Supplementary information**

**Catchment-scale mechanistic predictions of microplastic transport and distribution across land and water.**

Magnus Norling1*, Rachel Hurley1, Theresa Schell2, Martyn N. Futter3, Andreu Rico2,4, Marco Vighi2, Alberto Blanco2, Jose L. J. Ledesma5, Luca Nizzetto1,6*

1 Norwegian Institute for Water Research, NO-0349, Oslo, Norway.

2 IMDEA Water Institute, Science and Technology Campus of the University of Alcala, Avenida Punto Com 2, 28805, Alcala ´ de Henares, Madrid, Spain

3 Department of Aquatic Sciences and Assessment, Swedish University of Agricultural Sciences, Uppsala, Sweden.

4 Cavanilles Institute of Biodiversity and Evolutionary Biology, University of Valencia, c/ Catedrático José Beltrán 2, 46980, Paterna, Valencia, Spain

5 Karlsruhe Institute of Technology, Institut für Geographie und Geoökologie, Reinhard-Baumeister-Platz 1, 76131 Karlsruhe, Germany

6 Research Centre for Toxic Compounds in the Environment, Masaryk University, 62500, Brno, Czech Republic.

Contact information

Luca Nizzetto

[Luca.nizzetto@niva.no](mailto:Luca.nizzetto@niva.no)

Magnus Norling

[Magnus.norling@niva.no](mailto:Magnus.norling@niva.no)

*Table S1: Sampled concentrations of MP in sludge (dry weight, kg/kg). All samplings are from 2017. The location of the WWTPs is shown in Fig. M1 (above).*

| Location, time | Fragments | Fibers |
| --- | --- | --- |
| WWTP4, Nov. |  |  |
| WWTP4, Jul. |  |  |
| WWTP5, Nov. |  |  |
| WWTP5, Jul. |  |  |
| WWTP1, Nov. |  |  |
| WWTP1, Jul. |  |  |

*Table S2: Sampled concentrations of MP in wastewater effluents (mg/l). All samplings are from 2017. The location of the WWTPs is shown in Fig. M1 (above).*

| Location, time | Fragments | Fibers |
| --- | --- | --- |
| WWTP4, Jul. |  |  |
| WWTP4, Nov. |  |  |
| WWTP5, Jul. |  |  |
| WWTP5, Nov. |  |  |
| WWTP1, Jul. |  |  |
| WWTP1, Nov. |  |  |
| WWTP3, Jul. |  |  |
| WWTP3, Nov. |  |  |
| WWTP2, Jul. |  |  |
| WWTP2, Nov. |  |  |

**Text S1. Results for calibration of the hydrology module**

INCA-MP hydrology module was calibrated exploiting water discharge observations in three points aggregating fluxes from the Badiel and Sorbe subcatchments and the whole Henares catchment. The quality of the hydrological predictions for the Badiel reach (a tributary of the Henares draining a small agricultural sub-catchment) was poor compared to that of the other subcatchment. This may be linked to uncharted water abstraction and wastewater discharges by local farms and small villages. Because of the small size of this subcatchment this did not have a considerable effect on the quality of the predition at the Henares point. In order to prevent conveying this confounding factor further, data from the Badiel were excluded from calibration and model assessment.

| River | Nash-Sutcliffe |  |
| --- | --- | --- |
| Henares | 0.55 | 0.56 |
| Sorbe | 0.48 | 0.49 |
| Badiel | 0.34 | 0.34 |

Table S3: Calibration statistics for river water flow predictions in the three subcatchments.


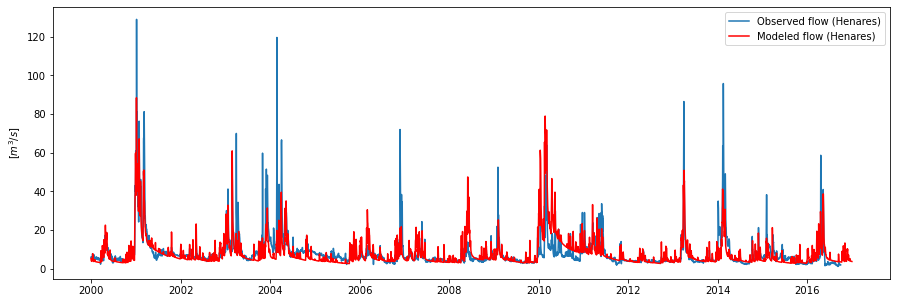


Figure S1: Observed vs. modelled water flow in the Henares.

**Text S1 Model development**

**S1.1 Hydrology module and hydrology calibration**

The hydrological model driving on-land mobilization and in-river transportation of microplastics and sediments is based on PERSiST1 with modifications to increase the details for the description of the stream’s erosive potential. In particular, the stream profile is assumed to be a trapezoid, with a bottom width and a bank slope so that the top width and cross-sectional area of the stream are given by

respectively, where is the depth of the middle of the stream, is the reach volume, and is the reach length. Solving for we get

In order to calculate the velocity of stream water in a given reach the wetted perimeter and the hydraulic radius R are calculated as follows:

Next, using the Manning flow equation, we compute the reach velocity as a function of *R,* as:

where is the Manning roughness coefficient, and is the reach slope (along the flow direction). We now have a solvable system:

where is the reach flow the flow from upstream (i.e. the sum of the flow in all reaches entering the current one), the diffuse flow input from land, effluent flows of water to the stream, and is abstraction flow from the stream. One can then compute the shear stress of the reach acting on the sediment bottom as:

where is the density of water (), and is the Earth surface gravitational acceleration (). Here is a tuning parameter that can be used to accommodate for non-ideal conditions like turbulence or uneven geometry. Its default value is 1.

*Table S3: Model values associated to the in-stream hydrology.*

| Symbol | Unit | Name | Indexes | Type |
| --- | --- | --- | --- | --- |
|  |  | Reach length | R | parameter |
|  |  | Catchment area | R | parameter |
|  |  | Reach bottom width | R | parameter |
|  |  | Reach bank slope | R | parameter |
|  |  | Reach slope | R | parameter |
|  |  | Manning’s roughness coefficient | R | parameter |
|  |  | Shear stress coefficient | R | parameter |
|  |  | Reach cross section area | R | state var. |
|  |  | Reach depth | R | state var. |
|  |  | Reach top width | R | state var. |
|  |  | Reach wetted perimeter | R | state var. |
|  |  | Reach hydraulic radius | R | state var. |
|  |  | Reach velocity | R | state var. |
|  |  | Reach shear stress | R | state var. |
|  |  | Reach flow | R | state var. |
|  |  | Reach flow from upstream | R | state var. |
|  |  | Total diffuse flow input from land | R | state var. |
|  |  | Effluent flow input | R | parameter or input |
|  |  | Abstraction flow | R | parameter or input |
|  |  | Reach volume | R | state var. |

PERSiST was first calibrated against, a 21 year-long time series of observations of rainfall and river discharges. This was performed independently from the sediment and microplastic transport module. The hydrological parameters were then held constant for all the model runs in the Monte Carlo sampling.

Due to highly different flow characteristics, each sub-catchment detailed in the case study scenario (Figure M2.1) was given its own set of landscape unit parameterizations (so that, for example, the agricultural hydrology in one subcatchment is different from the agricultural hydrology in anotherone). The hydrology in the area subject to sludge application was assumed to be the same across the three sub-catchments. This is justified considering the treated surface was very small compared to the total catchment area and the river hydrology was insensitive to possible variability occurring at this scale.

An auto-calibrator2 was used to calibrate PERSiST to the observed flow in the rivers during the time interval 1997-2016.

**S1.2 On-land mobilization and transport of particles**

On Land mobilization of microplastics is computed using a mechanistic frame consistent with that of the transport of natural sediment described by Lazar et al.3. In INCA-MP the land mobilization of microplastics is described individually per each size class. Similar to the approach of Lazar et al.3, mobilization is computed separately per land-use class, per reach and then aggregated to a total value per reach.

For each particle class (defined based on pair values of size and density), the on-land store is split between an immobile store and a surface store . First, the surface store can receive a flux of new particles added to the soil (an input time series) denoted by . Moreover, particles will infiltrate from the surface store to the immobile store at a constant tunable infiltration rate . Empirical evidence has already confirmed the occurrence of such a vertical transfer of MP in soil4,5. Hence, new intermediate values for the two stores at time are given by:

Particles can then be transferred from the immobile to the surface store via a splash detachment flux , caused by rainfall.

Here, is a per-class scaling parameter, is the rainfall, is a soil-specific erosion potential parameter, and is a vegetation cover index (. The vegetation index for soils is set to 1 outside of growing season, while during growing season it is proportional to how much of the land is covered by vegetation.

The surface transport capacity describes the total amount of particles (among all classes) that can effectively be transported from the surface store to the river. It is assumed to be common for all the particle classes and it is computed per landscape type and reach as

Here, is the subcatchment area, the reach length, is the direct runoff flow (calculated by PERSiST) and , and are subcatchment-specific calibration parameters. If the transport capacity exceeds the amount of particles in the surface store after splash detachment, then all the detached particles are removed from the surface store and sent to the reach as a part of the flux from land to river . If the capacity is smaller than the surface store, then the mass of particles of a class *j* transported to the river is given by:

Here, is the new surface store after accounting for splash detachment. If the transport capacity is not exceeded, the remaining capacity can be used for flow erosion from the immobile store to the reach. In that case, one computes a flow erosion flux , which gets added to . The potential flow erosion from each class is:

where is a per-particle-class flow erosion potential, , and are subcatchment-specific calibration parameters, and is the immobile store after accounting for splash detachment. If the total potential flow erosion of all classes does not exceed the remaining transport capacity, then it is enacted, otherwise the flow erosion from each class is reduced proportionally to fit the remaining transport capacity:

Finally, there are matrices and describing transfer of mass between classes of particles on land and in the reach. This can represent processes like the breaking of particles into smaller ones, transformation by biodegradation or particles binding with larger sediment clumps. is used to transform the two on-land stores, while is used to transform the suspended and sediment bed particles: At the end of each timestep, for a given store and a given particle class , we compute

where is the mass of class in the store before the transfer, and is the new mass after the transfer. I.e. is the proportion of the mass that is transferred from class to class each time step.

*Table S4: Model values associated to the on-land mobilization of MP.*

| Symbol | Unit | Name | Indexes | Type |
| --- | --- | --- | --- | --- |
|  |  | Grain infiltration rate | C, L | parameter |
|  |  | Grain input to land | C, L | parameter or input |
|  |  | Splash detachment scaling factor | C, L | parameter |
|  |  | Splash detachment soil erodibility | L | parameter |
|  |  | Vegetation index | L | parameter |
|  |  | Transport capacity scaling factor | R | parameter |
|  |  | Transport capacity direct runoff threshold | R | parameter |
|  |  | Transport capacity nonlinear coefficient | R | parameter |
|  |  | Flow erosion scaling factor | R | parameter |
|  |  | Flow erosion direct runoff threshold | R | parameter |
|  |  | Flow erosion nonlinear coefficient | R | parameter |
|  |  | Flow erosion potential | C, L | parameter |
|  |  | Mass transfer matrix (land) | C-C | parameter |
|  |  | Mass transfer matrix (reach) | C-C | parameter |
|  |  | Precipitation | None or R | input |
|  |  | Direct runoff flow | L, R | state var. |
|  |  | Splash detachment | C, L, R | state var. |
|  |  | Surface transport capacity | L, R | state var. |
|  |  | Flow erosion | C, L, R | state var. |
|  |  | Surface grain store | C, L, R | state var. |
|  |  | Immobile grain store | C, L, R | state var. |

**S1.3 In-stream dynamics**

To determine the behavior of each class of microplastic particles we use the following parameters: i) and : the minimal and maximal size of the major (longest) axis of particles in the class; ii) : the ratio of the major axis to the minor axis; and iii) the mass density of the particles. By changing these parameter values one can in principle set the model to handle different types of microplastics (e.g. either fragments or fibers, where fragments can also be used to represent pellets). We then compute the major and minor axes of a representative particle of this class to conform with the terminology used by Waldschläger and Schüttrumpf 6 :

For simplicity we also assume that the two shortest axes are the same ( It should be noted that all the equations used in the model are also appropriate for natural (mineral) sediments (e.g. 3). Thus, one can attempt to constrain some of the process parameters (such as entrainment rates) using mineral sediment data (which are typically more common that microplastics) when available.

The in-stream microplastic particle erosion and transportation is described as follows for each given class of particles. The masses of suspended particles and bed sediment particles (per unit area) are governed by the equations:

where is flux from upstream, is input from land and are fluxes associated to effluent and abstraction flows, is direct deposition of particles to the reach (e.g. from dumping), while is settling/deposition from the suspended state to the bed, and is remobilization/entrainment of settled particles to the suspended state. The last term is the flux out of the reach following the river flow.

Suspended particles are assumed to be in free fall, so that:

where is a representative terminal settling velocity for particles belonging to a given class . The terminal settling velocity is computed following Waldschläger and Schüttrumpf 6 whereby the equivalent diameter is:

We also define and by replacing with and (and adjusting and accordingly) in the above equations. The Corey shape factor is:

We use the following approximation of the reach kinematic viscosity7:

where is the water temperature in the river. The water temperature is approximated (in first approximation) from air temperature using a very simple time lag model. The Reynold’s number, drag coefficient and terminal settling velocity are:

The last three equations are circularly referential. To solve them, we start with an initial guess using the Stokes equation:

then iterate through the three equations until has converged to within an absolute error of .

To compute the remobilization, we first compute the critical shear stress. The non-dimensional Shields parameter of a given particle class, following6 is:

Where is the critical Shields parameter of the sediment bed, computed using Table 4 in ref. 6, and is the median bed grain diameter. Here, we use to compute the critical shear stress for mobilizing the smallest particles in the class. Now, the critical shear stress is

To compute the largest equivalent diameter a particle can have if it is to be mobilized (), we now solve the previous equation for with the actual shear stress standing in for the critical shear stress, and we get:

The proportion of a given class that can be entrained is estimated as:

We can now finally compute:

where is an entrainment scaling factor that relates the excess shear stress to the entrainment flux.

*Table S5: Model values associated to the in-stream dynamics of MP.*

| Symbol | Unit | Name | Indexes | Type |
| --- | --- | --- | --- | --- |
|  |  | Major axis of smallest particle in class | C | parameter |
|  |  | Major axis of largest particle in class | C | parameter |
|  |  | Ratio of major to minor particle axis | C | parameter |
|  |  | Particle density | C | parameter |
|  |  | Median diameter of bed sediment | R | parameter |
|  |  | Entrainment coefficient | R | parameter |
|  |  | Concentration of particles in effluent inputs | C, R | parameter or input |
|  |  | Direct deposition of particles to reach | C, R | parameter or input |
|  |  | Particle major axis (representative) | C | computed |
|  |  | Particle second longest axis (repr.) | C | computed |
|  |  | Particle minor axis (repr.) | C | computed |
|  |  | Particle equivalent diameter (repr.) | C | computed |
|  |  | Equivalent diameter of smallest in class | C | computed |
|  |  | Equivalent diameter of largest in class | C | computed |
|  |  | Corey shape factor | C | computed |
|  |  | Water temperature | R | state var. |
|  |  | Reach kinematic viscosity | R | state var. |
|  |  | Particle Reynold’s number | C, R | state var. |
|  |  | Particle drag coefficient | C, R | state var. |
|  | /s | Particle terminal settling velocity | C, R | state var. |
|  |  | Particle non-dimensional Shields par. | C, R | state var. |
|  |  | Sediment bed critical Shields parameter | R | state var. |
|  |  | Critical shear stress for entrainment | C, R | state var. |
|  |  | Smallest equiv. diam. that can be entrained | C, R | state var. |
|  |  | Proportion of particles in class entrainable | C, R | state var. |
|  |  | Entrainment flux | C, R | state var. |
|  |  | Settling flux | C, R | state var. |
|  |  | Particle flux from upstream | C, R | state var. |
|  |  | Total particle flux from land | C, R | state var. |
|  |  | Particles removed by abstraction | C, R | state var. |
|  |  | Particles entering stream from effluents | C, R | state var. |
|  |  | Mass of suspended particles in reach | C, R | state var. |
|  |  | Mass of particles in sediment bed | C, R | state var. |

*Table S6: The parameter space that was sampled in the Monte Carlo simulation. Not all these parameters have a 1-1 correspondence with model parameters, instead one or multiple model parameters were computed based on these values.*

| Parameter name | Short name | Unit | Prior distribution |
| --- | --- | --- | --- |
| Wastewater conc. Fragments | ww frag |  | Lognormal, fit to observed samples (Table S2) |
| Wastewater conc. Fibres | ww fib |  | Lognormal, fit to observed samples (Table S2) |
| Sludge conc. Fragments | sl frag |  | Lognormal, fit to observed samples (Table S1) |
| Sludge conc. Fibres | sl fib |  | Lognormal, fit to observed samples (Table S1) |
| Ambient grain input to land | amb |  | Uniform (0, 0.0004) |
| Entrainment coefficient | entr |  | Uniform (,) |
| Infiltration rate | inf |  | Uniform (0.001, 0.05) |
| Splash detachment scaling factor | sd |  | Uniform (0.1, 100) |
| Transport capacity scaling factor | tc |  | Uniform (0.01, 1) |


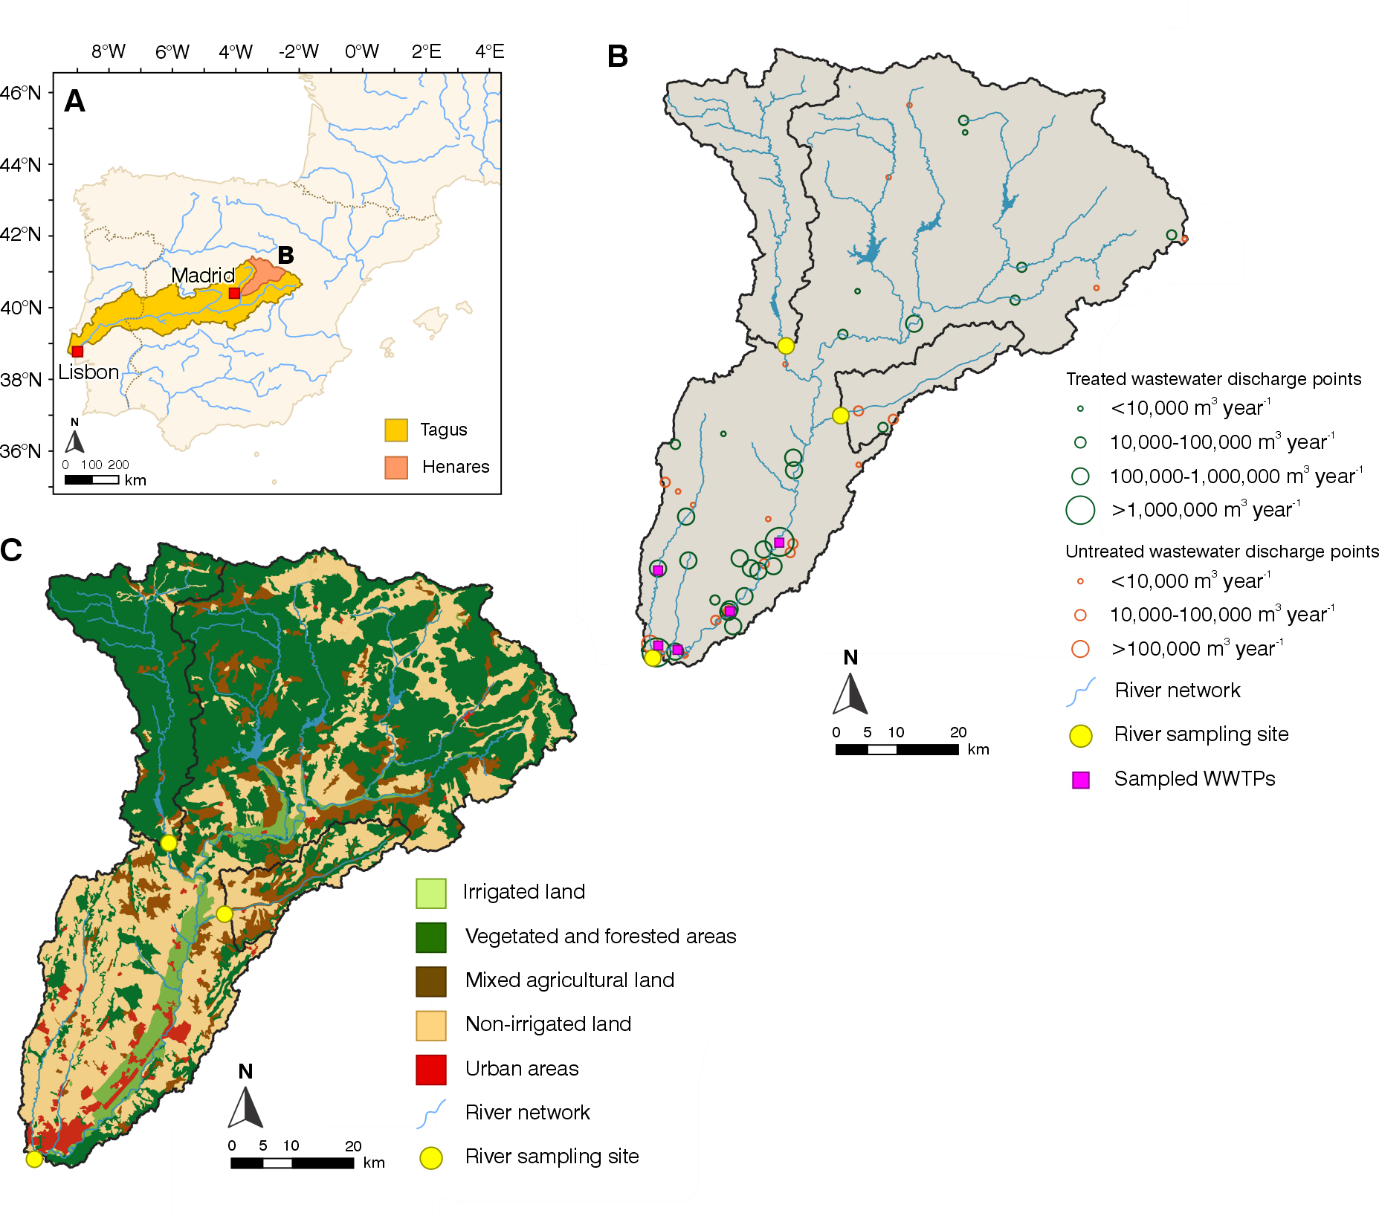


*Figure S2: Modeled catchment Henares (and subcatchments (Badiel and Sorbe). Purple dots in the upper map indicate location of microplastic sampling. The upper map shows also locations of wastewater discharge. Landuse is shown in the lower map.*

*Table S7: Subcatchment characteristics and microplastic sampling dates.*

| River name | Tajo station no. | Characteristic | Coordinates | Sampling dates |
| --- | --- | --- | --- | --- |
| Henares | Site 3 (3062) | Downstream of WWTP inlets; urban and industry areas. | 40.4598, -3.4215 | 25.07.2017, 06.11.2017, 24.04.2018 |
| Sorbe | Site 1 (3067) | Upstream all WWTP, mainly influenced by natural and forest areas. | 40.8913, -3.1812 | 01.08.2017,  09.11.2017, 23.04.2018 |
| Badiel | Site 2 (3255) | Agr. Influenced, small amount of untreated WW. | 40.7968, -3.0812 | 01.08.2017,  09.11.2017, 23.04.2018 |

*Table S8: Land use distribution in the subcatchments.*

| Catchment/Land use | Agricultural  (non-sludge) | Agricultural  (sludge) | Natural | Urban |
| --- | --- | --- | --- | --- |
| Henares | 49.6% | 2% | 45.3% | 3% |
| Sorbe | 6.1% | 0.2% | 93.7% | 0% |
| Badiel | 70.1% | 1.9% | 27.9% | 0% |

**References**

1. Futter, M. N. *et al.* PERSiST: a flexible rainfall-runoff modelling toolkit for use with the INCA family of models. *Hydrol. Earth Syst. Sci.* **18**, 855–873 (2014).

2. Norling, M. D., Jackson-Blake, L. A., Calidonio, J.-L. G. & Sample, J. E. Rapid development of fast and flexible environmental models: the Mobius framework v1.0. *Geoscientific Model Development* **14**, 1885–1897 (2021).

3. Lazar, A. N. *et al.* An assessment of the fine sediment dynamics in an upland river system: INCA-Sed modifications and implications for fisheries. *Science of The Total Environment* **408**, 2555–2566 (2010).

4. Crossman, J., Hurley, R. R., Futter, M. & Nizzetto, L. Transfer and transport of microplastics from biosolids to agricultural soils and the wider environment. *Sci. Total Environ.* **724**, 138334 (2020).

5. Rehm, R., Zeyer, T., Schmidt, A. & Fiener, P. Soil erosion as transport pathway of microplastic from agriculture soils to aquatic ecosystems. *Science of The Total Environment* **795**, 148774 (2021).

6. Waldschläger, K. & Schüttrumpf, H. Effects of Particle Properties on the Settling and Rise Velocities of Microplastics in Freshwater under Laboratory Conditions. *Environ. Sci. Technol.* **53**, 1958–1966 (2019).

7. Nizzetto, L. *et al.* Assessment of contaminant fate in catchments using a novel integrated hydrobiogeochemical-multimedia fate model. *Science of The Total Environment* **544**, 553–563 (2016).
